# Supplementary material for: Direct adhesion between Cu foil and polytetrafluoroethylene without increasing surface roughness for high-frequency printed wiring boards
Source: Royal Society of Chemistry journal article supplement (doi:10.1039/d3ra03839d), 2023-01-01
Supplement: d3ra03839d1.pdf [file d3ra03839d1.pdf]

## Supplementary Information

# Direct adhesion between Cu foil and polytetrafluoroethylene without increasing surface roughness for high-frequency printed wiring boards

Misa Nishino,<sup>a</sup> Takumi Kodama,<sup>a</sup> Kazuya Yamamura,<sup>a</sup> and Yuji Ohkubo\*<sup>a</sup>

<sup>a</sup>Graduate School of Engineering, Osaka University, 2-1 Yamadaoka, Suita, Osaka, 565-0871, Japan;

### Contents

- Schematic of 90° peel test..... Fig. S1
- C1s-XPS spectra of peeling interface of Cu/GC-PTFE..... Fig. S2
- Si2p-XPS spectra of peeling interface of Cu/GC-PTFE..... Fig. S3

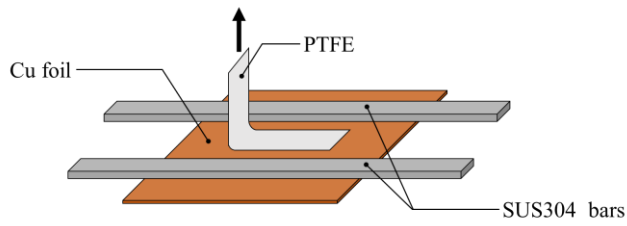

**Fig. S1** Schematic of 90° peel test.

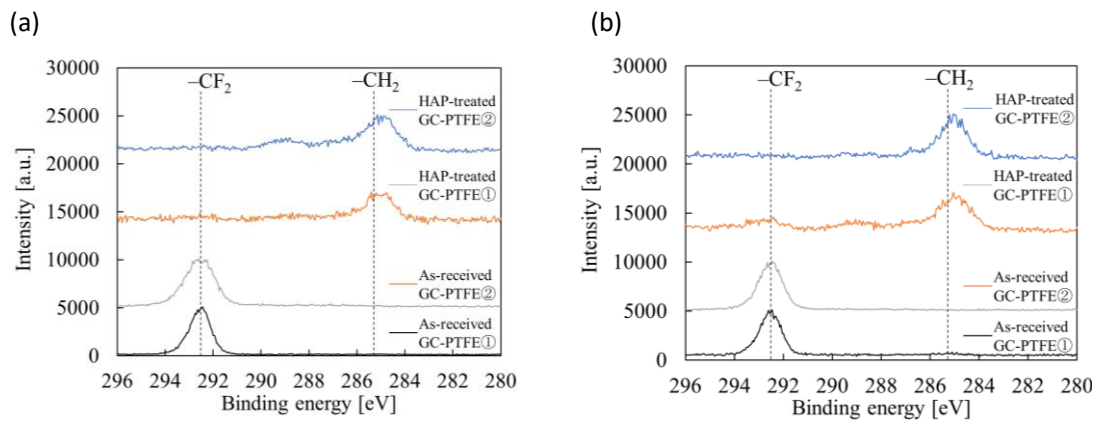

**Fig. S2** C1s-XPS spectra of peeling interface of Cu/GC-PTFE: (a) PTFE side; (b) Cu side.

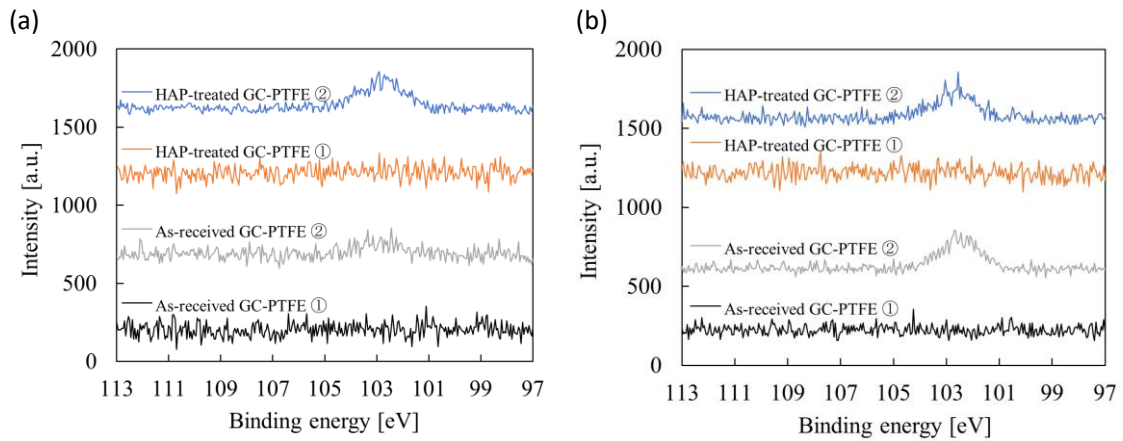

**Fig. S3** Si2p-XPS spectra of peeling interface of Cu/GC-PTFE: (a) PTFE side; (b) Cu side.
